# Supplementary material for: Direct measurement of the viscosity of ternary aerosol mixtures
Source: Royal Society of Chemistry journal article supplement (doi:10.1039/d2ea00160h), 2023-01-01
Supplement: d2ea00160h1.pdf [file d2ea00160h1.pdf]

## Supplement of: Direct Measurement of the Viscosity of Ternary Aerosol Mixtures

Sunandan Mahant,<sup>1</sup> Emil M. Iversen,<sup>2</sup> Sabin Kasparoglu,<sup>1</sup> Merete Bilde,<sup>2</sup> and Markus D. Petters<sup>1</sup>

<sup>1</sup>Department of Marine, Earth, and Atmospheric Science, North Carolina State University, Raleigh, North Carolina, USA.

<sup>2</sup>Department of Chemistry and iCLIMATE, Aarhus University, 8000 Aarhus C, Denmark.

## Design and Performance Characteristics of the Thermal Conditioner

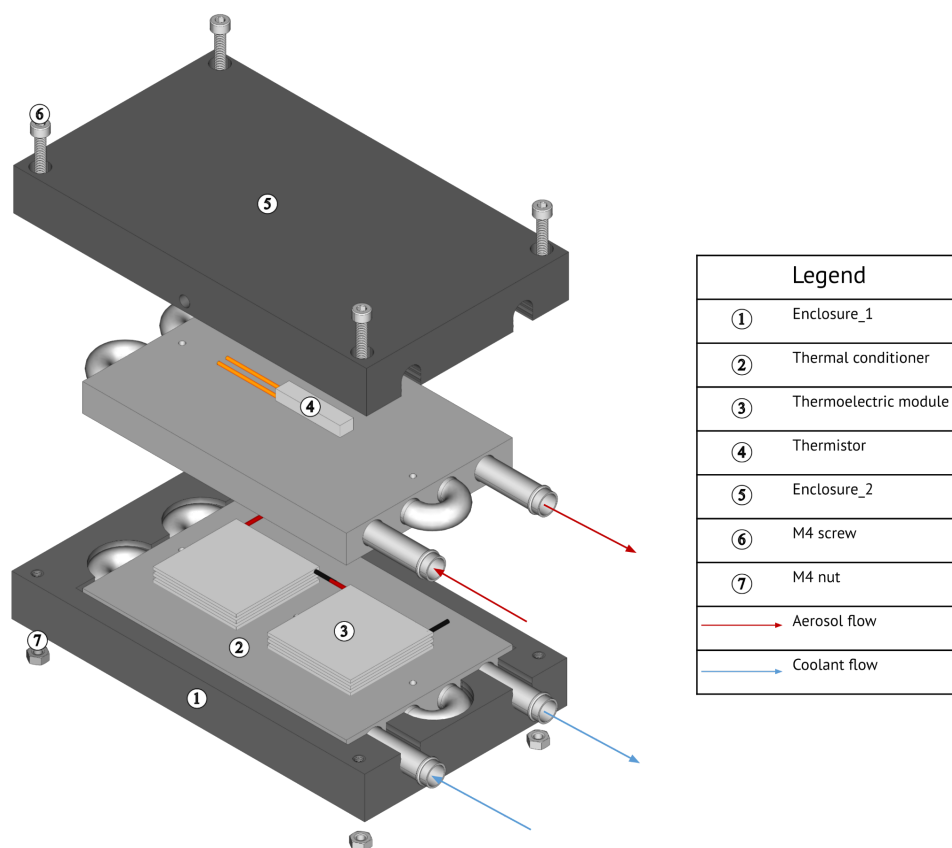

**Figure S1.** Schematic design of the revised thermal conditioner.

A schematic of the design of the thermal conditioner is provided in Figure S1. The thermal conditioner consists of two heat exchanger loops that were removed from a commercial air-cooled Peltier-thermoelectric liquid cooler (TE Technology, LC-061). The top loop is used to thermally condition the aerosol sample flow. The bottom loop is used to heatsink two 48W two-stage thermoelectric modules (CustomThermoelectric, 25412-5L31-07CQQ). The bottom loop is cooled with fluid from a chilled bath circulator (PolyScience, Model 9102) operated at

5 °C. Liquid cooling was used to avoid unnecessary heat sources inside the thermally insulated box (Figure 1, main manuscript). Temperature was measured by mounting a 15 k $\Omega$  thermistor (TE Technology, MP-3193) to the outside of the metal plate. The thermoelectric modules are operated in series and powered using a 24V DC 12.5 A power supply and controlled using a bipolar proportional-integral-derivative temperature controller (TE Technology, TC-36-25-RS232). Cover plates were custom designed and printed using a 3D extrusion printer using polyethylene terephthalate glycol (PETG) plastic. The cover plates provide thermal insulation and structural stability of the device. This thermal conditioner can be heated up to 100 °C and cooled ~50 °C below the temperature of the heatsink. A different thermistor is needed if cooled below -20 °C.

Figure S2 shows an example temperature scan using this device. Unlike Figure 3 in the main manuscript, there is no thermal lag. This conditioner was used for the ternary mixture experiments.

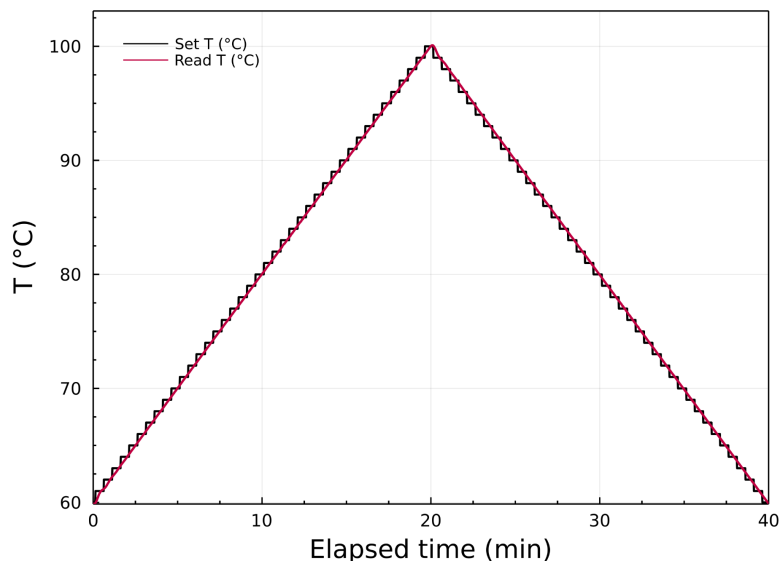

**Figure S2.** Set point and read temperature of an example scan obtained with the revised thermal conditioner. Steps of the setpoint temperature are due to an unintentional rounding to the nearest integer when writing the output data file. The rounding is caused by a typo in the data acquisition code, which specified %3.f versus the intended %.3f as string format specifier.

**Table S1.** Summary of all experiments. Numbers in columns (a)-(c) denote the fractional concentration (weight), date and time indicate the timestamp of the start of the scan,  $D_p$  indicates the mobility diameter selected by the DMA in nm,  $RH \pm \sigma_{RH}$  denote the mean and standard deviation of the relative humidity in % of the sample flow,  $T_s \pm \sigma_{Ts}$  denotes mean and standard deviation the temperature inside the enclosure in °C.  $A_1$  and  $A_2$  denote the  $\mu_{PH}$  before and after transition for the fitted model (Eq. 2).  $T_t$  and  $\sigma_{Tt}$  denote the fitted transition temperature and standard deviation for each experiment in °C.

| Suc <sup>(a)</sup>                                                                                | Cit <sup>(b)</sup> | Tar <sup>(c)</sup> | Date       | Time     | $D_p$ | RH  | $\sigma_{RH}$ | $T_s$ | $\sigma_{Ts}$ | a    | b    | T ramp | $A_1$  | $A_2$  | $T_t$ | $\sigma_{Tt}$ |
|---------------------------------------------------------------------------------------------------|--------------------|--------------------|------------|----------|-------|-----|---------------|-------|---------------|------|------|--------|--------|--------|-------|---------------|
| [-]                                                                                               | [-]                | [-]                | [yyyymmdd] | [h:m:s]  | [nm]  | [%] | [%]           | [°C]  | [°C]          | [-]  | [-]  | [°C]   | [-]    | [-]    | [°C]  | [°C]          |
| 1                                                                                                 | 0                  | 0                  | 20220825   | 16:29:30 | 250   | -   | -             | -     | -             | 160  | 480  | 60-100 | 359.3  | 376.1  | 83.7  | 4.9           |
| 1                                                                                                 | 0                  | 0                  | 20220829   | 14:22:00 | 300   | -   | -             | -     | -             | 160  | 480  | 60-100 | 374.5  | 439.7  | 84.8  | 2.8           |
| 1                                                                                                 | 0                  | 0                  | 20220826   | 10:57:50 | 350   | -   | -             | -     | -             | 160  | 480  | 60-100 | 367.4  | 442.7  | 86.9  | 1.8           |
| 1                                                                                                 | 0                  | 0                  | 20220826   | 11:46:40 | 400   | -   | -             | -     | -             | 320  | 960  | 60-100 | 794.0  | 853.5  | 87.1  | 1.5           |
| 1                                                                                                 | 0                  | 0                  | 20220829   | 12:42:00 | 450   | -   | -             | -     | -             | 600  | 1040 | 60-100 | 912.5  | 944.8  | 88.2  | 1.5           |
| 1                                                                                                 | 0                  | 0                  | 20220826   | 13:30:00 | 500   | -   | -             | -     | -             | 600  | 1040 | 60-100 | 915.8  | 966.8  | 88.7  | 1.6           |
| 1                                                                                                 | 0                  | 0                  | 20220826   | 14:19:20 | 550   | -   | -             | -     | -             | 720  | 1440 | 60-100 | 1228.7 | 1301.9 | 88.8  | 1.3           |
| 1                                                                                                 | 0                  | 0                  | 20220829   | 15:03:00 | 600   | -   | -             | -     | -             | 800  | 1600 | 60-100 | 1380.8 | 1490.8 | 89.4  | 1.3           |
| 1                                                                                                 | 0                  | 0                  | 20220826   | 16:26:00 | 650   | -   | -             | -     | -             | 800  | 2000 | 60-100 | 1694.3 | 1838.1 | 89.2  | 1.6           |
| 1                                                                                                 | 0                  | 0                  | 20220826   | 17:12:00 | 700   | -   | -             | -     | -             | 1200 | 2400 | 60-100 | 2042.8 | 2215.5 | 89.8  | 1.3           |
| Experiments below this line used the setup in Figure 1, above this line the setup in Section 2.3. |                    |                    |            |          |       |     |               |       |               |      |      |        |        |        |       |               |
| 1                                                                                                 | 0                  | 0                  | 20220926   | 15:26:00 | 300   | 3.1 | 0.04          | 5.6   | 0.02          | 250  | 500  | 60-100 | 410.0  | 476.9  | 88.3  | 1.8           |
| 0.8                                                                                               | 0.2                | 0                  | 20220928   | 14:37:10 | 300   | 1.6 | 0.03          | 8.0   | 0.05          | 250  | 500  | 40-80  | 448.2  | 474.6  | 70.1  | 1.6           |
| 0.6                                                                                               | 0.4                | 0                  | 20220928   | 17:34:00 | 300   | 2.0 | 0.04          | 7.6   | 0.05          | 250  | 500  | 35-75  | 442.0  | 474.7  | 56.3  | 4.2           |
| 0.4                                                                                               | 0.6                | 0                  | 20221012   | 16:25:15 | 300   | 1.4 | 0.03          | 7.8   | 0.07          | 250  | 500  | 25-65  | 458.6  | 475.7  | 44.7  | 3.6           |
| 0.2                                                                                               | 0.8                | 0                  | 20220929   | 12:28:05 | 300   | 2.0 | 0.05          | 8.0   | 0.06          | 250  | 500  | 15-55  | 454.2  | 470.0  | 39.1  | 2.9           |
| 0                                                                                                 | 1                  | 0                  | 20220928   | 16:29:30 | 300   | 1.9 | 0.04          | 7.6   | 0.02          | 250  | 500  | 5-45   | 458.3  | 470.5  | 27.6  | 2.9           |
| 0.8                                                                                               | 0                  | 0.2                | 20221007   | 11:53:55 | 300   | 1.2 | 0.03          | 8.5   | 0.41          | 250  | 500  | 45-85  | 410.0  | 476.9  | 72.1  | 2.7           |
| 0.6                                                                                               | 0                  | 0.4                | 20221007   | 12:40:43 | 300   | 1.2 | 0.03          | 7.9   | 0.04          | 250  | 500  | 35-75  | 442.2  | 466.0  | 59.0  | 2.7           |
| 0.4                                                                                               | 0                  | 0.6                | 20221007   | 13:32:05 | 300   | 1.3 | 0.05          | 7.7   | 0.01          | 250  | 500  | 25-65  | 447.1  | 471.9  | 47.2  | 7.4           |
| 0.2                                                                                               | 0                  | 0.8                | 20221007   | 14:15:35 | 300   | 1.3 | 0.03          | 7.7   | 0.02          | 250  | 500  | 15-55  | 452.1  | 474.5  | 38.5  | 2.6           |
| 0                                                                                                 | 0                  | 1                  | 20220929   | 16:41:45 | 300   | 2.4 | 0.04          | 8.5   | 0.03          | 250  | 500  | 5-45   | 454.7  | 471.3  | 26.9  | 2.5           |
| 0                                                                                                 | 0.8                | 0.2                | 20220929   | 13:20:15 | 300   | 2.1 | 0.04          | 8.6   | 0.02          | 250  | 500  | 15-45  | 455.4  | 467.8  | 27.6  | 1.0           |
| 0                                                                                                 | 0.6                | 0.4                | 20220929   | 14:13:05 | 300   | 2.2 | 0.04          | 8.6   | 0.02          | 250  | 500  | 5-45   | 458.3  | 470.5  | 25.6  | 0.8           |
| 0                                                                                                 | 0.4                | 0.6                | 20220929   | 14:58:00 | 300   | 2.3 | 0.03          | 7.7   | 0.02          | 250  | 500  | 5-45   | 456.9  | 467.4  | 27.1  | 2.4           |
| 0                                                                                                 | 0.2                | 0.8                | 20220929   | 15:43:45 | 300   | 2.3 | 0.04          | 7.7   | 0.02          | 250  | 500  | 5-45   | 456.1  | 465.8  | 26.6  | 1.7           |
| 0.6                                                                                               | 0.2                | 0.2                | 20221008   | 11:57:25 | 300   | 1.1 | 0.06          | 8.7   | 0.46          | 250  | 500  | 35-75  | 456.0  | 466.7  | 56.0  | 3.4           |
| 0.4                                                                                               | 0.4                | 0.2                | 20221007   | 16:18:45 | 300   | 1.4 | 0.03          | 7.7   | 0.02          | 250  | 500  | 25-65  | 455.3  | 465.8  | 47.2  | 1.8           |
| 0.4                                                                                               | 0.2                | 0.4                | 20221007   | 17:05:00 | 300   | 1.4 | 0.02          | 7.7   | 0.02          | 250  | 500  | 25-65  | 455.4  | 467.8  | 46.4  | 3.4           |
| 0.2                                                                                               | 0.6                | 0.2                | 20221008   | 13:00:26 | 300   | 1.2 | 0.02          | 7.7   | 0.02          | 250  | 500  | 15-55  | 460.0  | 470.7  | 37.2  | 4.7           |
| 0.2                                                                                               | 0.4                | 0.4                | 20221008   | 13:43:22 | 300   | 1.3 | 0.05          | 7.6   | 0.02          | 250  | 500  | 15-55  | 453.8  | 471.2  | 34.9  | 5.2           |
| 0.2                                                                                               | 0.2                | 0.6                | 20221008   | 14:26:30 | 300   | 1.3 | 0.05          | 7.5   | 0.01          | 250  | 500  | 15-55  | 452.3  | 471.6  | 37.7  | 3.2           |

<sup>(a)</sup>Sucrose

<sup>(b)</sup>Citric acid

<sup>(c)</sup>Tartaric acid

## Viscosity Calculation

Rothfuss and Petters (2016)<sup>1</sup> showed that the particle geometry factor  $\xi$  is related to the angle of attachment  $\theta$  given by Pokluda et al. (1997)<sup>2</sup> via

$$\xi = (1 + \cos(\theta))^2 \quad (\text{S1})$$

Pokluda et al. (1997)<sup>2</sup>, Table 1, gives simulated values “dimensionless neck” vs. “dimensionless time”. Dimensionless neck is defined as  $x/a$  where  $x$  is the radius of the neck and  $a$  is the radius of the partially coalesced sphere and  $\sin(\theta) = x/a$ . Dimensionless time is defined as

$$t = \frac{\tau\sigma}{a_{\text{mono}}\eta}, \quad (\text{S2})$$

where  $\tau$  tau is the residence time,  $\sigma$  is the interfacial tension,  $a_{\text{mono}}$  is the radius of the monomer, and  $\eta$  is the viscosity.

Solving equation S1 for  $\theta$  allows calculation of  $x/a$  from the geometry factor via

$$x/a = \sin(\arccos(\sqrt{\xi} - 1)) \quad (\text{S3})$$

Using linear interpolation between  $x/a$  and  $t$  from Table 1 in Pokluda et al. (1997) provides the appropriate value  $t_\xi$ . Solving Eq. (S3) for  $\eta$  then yields the estimated viscosity from numerical integration

$$\eta = \frac{\tau\sigma}{a_{\text{mono}}t_\xi} \quad (\text{S4})$$

For a  $D = 300$  nm sphere equivalent particle,  $a_{\text{mono}} = 119$  nm. For  $\xi = 2.5$ ,  $\tau = 11$  s,  $\sigma = 0.084$  J m<sup>-2</sup>, and  $a_{\text{mono}} = 119$  nm, the viscosity is  $6.85 \times 10^6$  Pa s. A spreadsheet with the appropriate calculations is included as part of the final data repository.

## References

- (1) Rothfuss, N. E.; Petters, M. D. Coalescence-Based Assessment of Aerosol Phase State Using Dimers Prepared through a Dual-Differential Mobility Analyzer Technique. *Aerosol Sci. Technol.* **2016**, *50* (12), 1294–1305. <https://doi.org/10.1080/02786826.2016.1221050>.
- (2) Pokluda, O.; Bellehumeur, C.; Vlachopoulos, J. Modification of Frenkel’s Model for Sintering. *AIChE J.* **1997**, *43*, 3253–3256. <https://doi.org/10.1002/aic.690431213>.
